# Supplementary material for: Bacterial tolerance to host-exuded specialized metabolites structures the maize root microbiome
Source: PubMed Central journal article supplement — Proc Natl Acad Sci U S A. 2023 Oct 25;120(44):e2310134120. doi: 10.1073/pnas.2310134120 (PMC10622871; doi:10.1073/pnas.2310134120), 2023-10-25
Supplement: pnas.2310134120.sapp.pdf [file pnas.2310134120.sapp.pdf]

1  
2  
3  
4  
5

## 6 Supporting Information for

# 7 Bacterial tolerance to host-exuded specialized 8 metabolites structures the maize root 9 microbiome

10 Lisa Thoenen<sup>1,2</sup>, Caitlin Giroud<sup>2</sup>, Marco Kreuzer<sup>3</sup>, Jan Waelchli<sup>2</sup>, Valentin Gfeller<sup>1</sup>, Gabriel  
11 Deslandes-Héroul<sup>1</sup>, Pierre Mateo<sup>1</sup>, Christelle A.M. Robert<sup>1</sup>, Christian H. Ahrens<sup>4</sup>, Ignacio Rubio-  
12 Somoza<sup>5</sup>, Rémy Bruggmann<sup>3</sup>, Matthias Erb<sup>1</sup>, Klaus Schlaeppi<sup>1, 2, \*</sup>

13 <sup>1</sup> Institute of Plant Sciences, University of Bern, 3013 Bern, Switzerland

14 <sup>2</sup> Department of Environmental Sciences, University of Basel, 4056 Basel, Switzerland

15 <sup>3</sup> Interfaculty Bioinformatics Unit, University of Bern, 3012 Bern, Switzerland

16 <sup>4</sup> Agroscope, Molecular Ecology and Swiss Institute of Bioinformatics, Zurich, 8046 Zürich,  
17 Switzerland

18 <sup>5</sup> Molecular Reprogramming and Evolution (MoRE) Lab, Centre for Research in Agricultural  
19 Genomics (CRAG), Carrer Vall Moronta Edifici CRAG, 08193, Barcelona, Spain

20

21 \* Corresponding author: Klaus Schlaeppi, [klaus.schlaeppi@unibas.ch](mailto:klaus.schlaeppi@unibas.ch)

22

### 23 This PDF file includes:

24 Supplementary Methods

25 Supplementary Figures S1 to S14

26 Supplementary Tables S1 to S5

27 Supplementary Datasets S1 and S2 (Captions)

28 References Supplementary Information

### 29 Other supporting materials for this manuscript include the following:

30 Datasets S1 and S2

## 31 **Supplementary Methods**

### 32 **Bacterial extracts**

33 Various types of bacterial extracts were prepared for establishing the culture collection and  
34 quantifying root bacterial community size. First, bacterial extracts from 'dirty roots' (marked as  
35 'RoRh' in [Dataset S1](#)) were prepared from 10 cm long root fragments (corresponding to the depth  
36 of -1 to -11 cm in soil) that were chopped into small pieces with a sterile scalpel after shaking off  
37 loose soil. These root fragments with firmly attached rhizosphere soil were then placed into 50 mL  
38 centrifuge tubes containing 10 mL sterile magnesium chloride buffer and Tween20 (10 mM MgCl<sub>2</sub>  
39 + 0.05% Tween; Sigma-Aldrich) for homogenization with a laboratory blender (Polytron,  
40 Kinematica, Luzern, Switzerland; 1 minute at 20'000 rotations per minute) followed by additional  
41 vortexing for 15 seconds. Extracts of washed roots (marked as 'root' in [Dataset S1](#)) were prepared  
42 analogously, except that the roots were washed twice in 50 mL centrifuge tubes with 25 mL of  
43 sterile deionized water and shaking the tubes 30 times vigorously to wash off the rhizosphere before  
44 cutting them in small pieces for homogenization. The rhizosphere fraction of the washing step was  
45 pelleted by sedimentation (supernatant was discarded) and resuspended in 5 mL MgCl<sub>2</sub>-Tween (10  
46 mM, 0.05%) to prepare the rhizosphere extracts for plating (marked as 'rhizo' in [Dataset S1](#)). Plating  
47 extracts from soil (marked as 'soil' in [Dataset S1](#)) were prepared by mixing 5 g of soil from the pot  
48 experiment with 5 mL MgCl<sub>2</sub>-Tween (10 mM, 0.05%) and vortexing for 15 seconds.

### 49 **Quantification of root bacterial community size with plating**

50 We quantified the sizes of the root bacterial communities of B73 and *bx1*(B73) (1) plants in two  
51 greenhouse experiments ([Table S2](#)). In both experiments, one half of the roots was freshly used  
52 for plating the cultivable bacteria and the other half stored at -80 °C for culture-independent  
53 quantitative PCR (qPCR) analysis (see below). The first experiment consisted of 6-week-old plants  
54 and 7-week-old plants (same as 'Isolation 4') were analyzed in the second experiment. Extracts of  
55 washed roots were freshly prepared as described above, serially diluted for plating and 20 µL were  
56 plated on 10% TSA (tryptic soy medium amended with 15 g/L agar; both Sigma-Aldrich) plates  
57 containing cycloheximide (10 mg/L, Sigma-Aldrich). Plates were tilted to spread the 20 µL drops  
58 for counting, then incubated for six days at room temperature (23 °C). The forming colonies were  
59 counted, multiplied by the dilution factor and the volume plated, and then normalized with the  
60 sample fresh weight. The colony forming unit (CFU) data was transformed with log<sub>10</sub> prior to  
61 statistical analysis (T-test) and visualization.

### 62 **Quantification of root bacterial community size with qPCR**

63 Complementary to CFU plating, we quantified bacterial community size on the second half of root  
64 samples using qPCR analysis. The frozen roots were lyophilized, and DNA was extracted using  
65 the Nucleo-Spin Soil DNA extraction kit (Macherey-Nagel, Düren, Germany) following the  
66 manufacturer's protocol. Additionally, we also utilized available DNA samples of our previous field

67 experiments in Changins (2), Reckenholz and Aurora (both (3)) for qPCR analysis. For all DNA  
68 samples, the concentration was measured using the AccuClear® Ultra High Sensitivity dsDNA  
69 Quantification Kit (Biotium, Fremont, United States) and adjusted to 1 ng/μL. qPCR reactions were  
70 set up in a total volume of 20 μL containing HOT FIREPol EvaGreen qPCR Mix Plus (Solis Biodyne,  
71 Tartu, Estonia), 250 nM of each primer, 0.3% bovine serine albumin, and 10 ng of root DNA. The  
72 size of the bacterial community was quantified on genomic DNA based on the bacterial 16S rRNA  
73 gene (primers 799F and 904R, [Table S3](#)) relative to the maize gene Actin (primers ZmActin1\_F  
74 and ZmActin1\_R1, [Table S3](#)). No-template-control reactions containing water were run in parallel  
75 as negative controls. qPCR reactions were set up (in triplicates for greenhouse experiments and in  
76 single reactions for samples from field experiment) using the Myra Liquid Handler (Bio Molecular  
77 Systems, Upper Coomera, Australia) and ran on a CFX96 Real Time System (Bio Rad, Hercules,  
78 California). The cycling program included an initial denaturation step at 95 °C for 15 min, followed  
79 by 80 cycles of 95 °C for 15 s, 63 °C for 40 s and 72 °C for 20 s, a hold phase at 72 °C for 10 min,  
80 followed by melting curve analysis (temperature incrementally increased by 0.5°C from 65 to 95 °C  
81 with steps held for 5 s). Raw data were exported directly from Bio-Rad CFX Manager 3.1 and  
82 imported into LinRegPCR version 2016.0 (4) to determine cycle threshold (Ct) and efficiency (E)  
83 using the default baseline limit option. The bacterial 16S rRNA gene signal was normalized to the  
84 plant signal using the following formula:  $16S\ rRNA/plant\ gene = E_{plant\ gene}^{Ct_{plant\ gene}}/E_{16S}^{Ct_{16S}}$ ,  
85 where Ct values of the individual reactions and mean E values over all reactions of a given primer  
86 pair and run were used for calculation (5). Data was transformed with log2 prior to statistical  
87 analysis (T-test) and visualization.

### 88 **MRB isolate identification**

89 The taxonomy of the purified isolates of the maize root bacteria (MRB) collection were identified by  
90 sequencing parts (base pairs 27 to 1492) of the 16S rRNA gene using Sanger technology. Liquid  
91 cultures were diluted 1:10 or 1:100 in sterile water and used as template for PCR. The PCR  
92 reactions were set up as follows: 15 μL sterile water, 15 μL 2x DreamTaq buffer (Thermo Fisher  
93 Scientific, Waltham, USA), 1.5 μL of each primer (stock concentration 10 μM, 27f and 1492r;  
94 sequences in [Table S3](#)) and 2 μL of the diluted liquid culture as DNA template. For some bacteria,  
95 the DNA was extracted using the GenElute™ Bacterial Genomic DNA Kit (Sigma-Aldrich). PCR  
96 was performed in a Biometra T-advanced cycler according to the following program: 95°C for 3  
97 min, 30 cycles with 95°C for 15 s, 55°C for 15 s and 72°C for 45 s followed by final elongation at  
98 72°C for 5 min. PCR products were verified on an agarose gel (1%; Sigma-Aldrich) and sent for  
99 Sanger sequencing with the primers 1492r and/or 27f (Microsynth, Balgach, Switzerland). Sanger  
100 sequences were blasted against the NCBI database (National Center for Biotechnology  
101 Information, Rockville Pike, USA) for species identification. All metadata, sequences, and  
102 taxonomies of the MRB culture collection are listed in the [Dataset S1](#).

## 103 **Mapping MRB isolates to microbiome profiles**

104 *Rationales:* We mapped the 16S rRNA gene (Sanger) sequences of the MRB strains to the 16S  
105 rRNA gene sequences of published maize community profiles. The first purpose was to investigate  
106 abundance of community members corresponding to MRB strains in profiles of maize roots from  
107 where the strains were isolated from. For this we mapped the MRB sequences to the data of the  
108 'feedback experiment' reported in Hu et al. 2018 (2). This was a greenhouse experiment with pots  
109 filled with natural field soil from the Changins site. Second, to study presence and abundance of  
110 community members (corresponding to MRB strains) in root profiles of field grown maize, we  
111 mapped the MRB sequences to the datasets of Changins ('field experiment' reported in 2),  
112 Reckenholz and Aurora (3) and the pot experiment in Sheffield (6). The third purpose was to  
113 examine differential abundance of the MRB strain corresponding community members in profiles  
114 of BX-producing vs BX-deficient plants (the field data of Changins (2) also includes profiles of the  
115 *bx1* mutant maize line).

116 *Bioinformatics:* Because the published datasets (2, 3, 6) utilized different bioinformatic approaches,  
117 we re-processed the deposited raw sequence data to have uniformly analyzed microbiome data,  
118 to which we then mapped the MRB strains (see below). The raw sequence reads were quality  
119 checked with FastQC (7), demultiplexed by cutadapt (8) and then processed using the DADA2  
120 pipeline with default options (9). The sequences were filtered by allowing maximal expected errors  
121 of two and with maximal zero Ns. Reads were truncated at the first instance of a quality score of  
122 less than three. The forward reads of the Changins, Reckenholz and Aurora data were trimmed to  
123 250 bp and reverse reads to 170 bp. As the sequences of the Sheffield data were only 250 bp long,  
124 forward reads were not trimmed and reverse reads to 200 bp. Shorter reads were discarded. For  
125 each MiSeq run, a parametric error model was learned by the DADA algorithm and inferred to the  
126 previously dereplicated samples. Then the forward and reverse reads were merged if the overlap  
127 was identical and at least twelve bases long. A single amplicon sequence variant (ASV) table was  
128 created as all datasets used the same 16S rRNA gene primers. We removed chimeras and  
129 assigned taxonomy to the ASVs with the naive Bayesian classifier method (9) and the SILVA  
130 database (10). Scripts are available from [https://github.com/PMI-](https://github.com/PMI-Basel/Thoenen_et_al_BX_tolerance)  
131 [Basel/Thoenen\\_et\\_al\\_BX\\_tolerance](https://github.com/PMI-Basel/Thoenen_et_al_BX_tolerance). The computations were performed at the Vital-IT  
132 (<https://www.vital-it.ch>) center for high-performance computing of the SIB Swiss Institute of  
133 Bioinformatics and at the sciCORE (<http://scicore.unibas.ch/>) scientific computing center of the  
134 University of Basel.

135 *Mapping:* We aligned the 16S rRNA sequences of the MRB obtained by Sanger sequences to  
136 overlap with the 16S rRNA gene region (primers 799F and 1193R; [Table S3](#)) of the microbiota  
137 profiles using the function *AlignSeqs* (R package DECIPHER, 11). Then, a distance matrix was  
138 calculated for all MRB sequences to the identified ASVs of the respective datasets using the  
139 function *DistanceMatrix* (DECIPHER). We did not consider mappings with <97% sequence



140 similarity, the typical threshold for defining operational taxonomic units (OTUs). Strains typically  
141 mapped to several ASVs (within 97%), hence their summed relative abundance was taken. The  
142 similarities of the MRB strain sequence to the microbiome members (i.e., the ASVs) are listed in  
143 [Dataset S2](#). Scripts are available from [https://github.com/PMI-Basel/Thoenen\\_et\\_al\\_BX\\_tolerance](https://github.com/PMI-Basel/Thoenen_et_al_BX_tolerance).  
144 Calculations were performed at sciCORE.

#### 145 **Isolation and purification of benzoxazinoids form maize plants**

146 DIMBOA-Glc was isolated from maize plants as described below. Ca. 200 g of maize leaves (*Zea*  
147 *mays*, variety Akku) were frozen and ground in liquid nitrogen. The resulting powder was placed in  
148 1.5 L MeOH and allowed to warm up to room temperature (23 °C). The resulting suspension was  
149 homogenized with an immersion disperser (PT-1035, Kinematica AG, Malters, Switzerland) and  
150 filtered through a P3 sintered glass filter equipped with two layers of filter paper, with suction. The  
151 filter cake was collected and suspended again in 0.6 L MeOH. After a second homogenization and  
152 a new filtration, the filtrates were combined and concentrated under reduced pressure with a rotary  
153 evaporator (RC900, KNF Neuberger AG, Balterswil, Switzerland). The aqueous residue obtained  
154 was lyophilized with a freeze-drier (LyoQuest-55, Telstar, Terrassa, Spain) to give 8.39 g of crude  
155 dry extract. Five runs of purification with ca. 1.7 g of raw material each were performed on an  
156 automated flash column chromatography apparatus (CombiFlash Rf+, Teledyne ISCO Inc., Lincoln  
157 NE, USA). Solid loading and 120 g silica cartridges were used. The elution gradient was as follow:  
158 0-13% B over 7 min, 13-16% B over 9 min, 16-35% B over 9 min where A = CHCl<sub>3</sub> and B = MeOH.  
159 The fractions eluting between 19 and 25 min were collected, combined, concentrated under  
160 reduced pressure and submitted to new runs of purification. Batches of approx. 250 mg were  
161 purified separately with solid loading, 40 g silica gold cartridges, and eluting with 0-15% B over 1.2  
162 min, 15-19% B over 7.2 min, 19-30% B over 1.2 min, 30% B over 3.6 min. The fractions eluting  
163 between 11 and 14 min were collected, combined, and concentrated under reduced pressure with  
164 a rotary evaporator (RC900, KNF Neuberger AG, Balterswil, Switzerland) to obtain 180 mg of a  
165 light-yellow foam (hygroscopic) containing ca. 70% DIMBOA-Glc, 15% DIM<sub>2</sub>BOA-Glc, 15%  
166 HMBOA-Glc. The analytical data were in accordance with previous literature: UPLC m/z 194.04  
167 [M-Glc-MeOH]<sup>+</sup>, Mass window: 0.02 Da. Retention time: 1.62 min. HRMS calculated for  
168 C<sub>15</sub>H<sub>18</sub>NO<sub>10</sub> [M-H]<sup>-</sup>: 372.0936, found: 372.0944; <sup>1</sup>H NMR (300 MHz, CD<sub>3</sub>OD) δ 7.26 (d, *J* = 8.8 Hz,  
169 1H), 6.75 (d, *J* = 2.6 Hz, 1H), 6.70 (dd, *J* = 8.8, 2.7 Hz, 1H), 5.91 (s, 1H), 4.67 (d, *J* = 7.8 Hz, 1H),  
170 3.78 (s, 3H), 3.9-3.1 (m, 6H) (12).

## 171 **High-throughput growth phenotyping of MRB strains**

172 We have described our high-throughput chemical phenotyping system, which we have used to  
173 screen MRB strains for their tolerance against various BXs compounds, in detail (13). Here we  
174 document the specific settings used in this study.

175 Setting up an assay requires the preparation of liquid pre-cultures in a 96-well format from fresh  
176 bacterial cultures on solid media plates. Pre-cultures were prepared by transferring isolate colonies  
177 with inoculation needles (Greiner bio-one, Kremsmünster, Austria) to 1 mL of liquid 50% TSB ([Table](#)  
178 [S5](#)) in 2 ml 96-well deep-well plates (Semadeni, Ostermundigen, Switzerland). These pre-culture  
179 growth plates were covered with a Breathe-Easy membrane (Diversified Biotech, Dedham, USA)  
180 and grown until stationary phase for 4 days at 28°C and 180 rotations per minute.

181 Assays were set up by inoculating 4 µL of the pre-cultures to 200 µL fresh liquid 50% TSB ([Table](#)  
182 [S5](#)) in 96-well microtiter plates (Corning, Corning, USA) containing the compounds and  
183 concentrations to be tested: DIMBOA-Glc (500 and 2'500 µM), MBOA and BOA (250, 500, 625,  
184 1'250, 2'500 and 5'000 µM), AMPO (10, 25 and 50 µM) or APO (10, 25 and 50 µM). These  
185 treatments were prepared by mixing their stock solutions into liquid 50% TSB. Stock solutions were  
186 prepared in the solvent DMSO (Sigma-Aldrich) depending on the solubility of the compounds ([Table](#)  
187 [S5](#)) and the DMSO concentration was kept constant in each treatment including the control.

188 All reactions and replicated plates were pipetted using a liquid handling system (Mettler Toledo,  
189 Liquidator 96™, Columbus, USA). All plates had lids and were piled up and inserted to a stacker  
190 (BioStack 4, Agilent Technologies, Santa Clara, United States), which was connected to a plate  
191 reader (Synergy H1, Agilent Technologies, Santa Clara, United States). Using this system, the  
192 optical density (OD600, absorbance at 600 nm) of every culture was recorded every 100 min over  
193 68 hours. Prior to each measurement, the plates were shaken for 120 s. In each plate, wells with  
194 50% TSB were included as 'no-bacteria-controls' and in each run one plate containing only media  
195 was included to monitor potential contaminations.

196 We set up separate runs for the different compounds. In one run, we always tested all  
197 concentrations of a compound against all 52 strains with 3 replicates per strain and an empty media  
198 control plate. For example, a typical run consisted of a total 23 plates that covered 11 treatments  
199 (e.g., 6 concentrations of MBOA + 3 concentrations of AMPO + 2 control treatments; 1 plate per  
200 treatment) \* 162 cultures (e.g., 52 strains and 2 no bacteria controls, all with 3 replicates; distributed  
201 on 2 plates) plus 1 media plate without bacteria. Such a run yielded 1'782 single growth reactions.  
202 We have performed at least 2 full runs for every compound (except DIMBOA-Glc due to low  
203 availability of the compound). Data were exported from the software of the plate reader (Gen 5,  
204 Agilent Technologies, Santa Clara, United States) and imported into R for data analysis (see main  
205 methods).

## 206 **Bacterial genomes**

207 We generated the genomes of a subset of MRB strains in four sets ([Dataset S1](#)).

208 *Set 1:* The first set of MRB strains consisted of the following four bacteria: *Pseudomonas* LPB4.O,  
209 *Pseudomonas* LPD2, *Rhizobium* LRC7.O and *Rhizobium* LRH8 ([Dataset S1](#)). Genomic DNA was  
210 extracted from overnight cultures grown in liquid LB medium ([Table S5](#)) using the GeneElute  
211 Bacterial DNA kit (Sigma-Aldrich). 10 kb insert libraries were prepared from the genomic DNA  
212 (BluePippin size selection) and sequenced on a PacBio (Pacific Biosciences, Menlo Park, USA)  
213 RSII instrument (one RSII SMRT cell per strain; P6-C4 chemistry) at the Functional Genomics  
214 Centre Zurich (<http://www.fgcz.ch>).

215 *Set 2:* The second set of MRB strains consisted of 10 bacteria ([Dataset S1](#)). Genomic DNA was  
216 extracted as for the first set and used for library preparation using NEBNext® DNA Library Prep Kit  
217 (New England Biolabs, Ipswich, USA) following the manufacturer's recommendations. The libraries  
218 were sequenced on a NovaSeq 6000 instrument (paired-end 150 bp reads; Illumina, San Diego,  
219 USA) by Sequentia ([www.sequentiabiotech.com](http://www.sequentiabiotech.com)) together with other samples of that company and  
220 the target to produce >1 Gb of data for each library.

221 *Set 3:* The majority of MRB strains (27 strains; [Dataset S1](#)) were sequenced in the third set. Total  
222 DNA was extracted using the DNeasy UltraClean Microbial Kit (Qiagen, Hilden, Germany)  
223 according to the protocol provided. Quantity, purity, and length of the total genomic DNA was  
224 assessed using a Qubit 4.0 fluorometer with the Qubit dsDNA HS Assay Kit (Thermo Fisher  
225 Scientific), a DS-11 FX spectrophotometer (DeNovix, Wilmington, USA) and a FEMTO Pulse  
226 System with a Genomic DNA 165 kb Kit (Agilent, Basel, Switzerland), respectively. Sequencing  
227 libraries were made using an Illumina DNA Prep Library Kit (Illumina, San Diego, USA) in  
228 combination with IDT for Illumina DNA/RNA UD Indexes Set C and Tagmentation according to the  
229 Illumina DNA Prep Reference Guide. The input DNA was set at 200 ng and 5 PCR cycles were  
230 employed to amplify the fragmented DNA. Pooled DNA libraries were sequenced paired end on a  
231 NovaSeq 6000 SP Reagent Kit v1 (300 cycles) on an Illumina NovaSeq 6000 instrument. The  
232 quality of the sequencing run was assessed using Illumina Sequencing Analysis Viewer (version  
233 2.4.7) and all base call files were demultiplexed and converted into FASTQ files using Illumina  
234 bcl2fastq conversion software v2.20. All steps from gDNA extraction to sequencing data generation  
235 were performed at the Next Generation Sequencing Platform, University of Bern, Switzerland.

236 *Set 4:* Several Microbacteria strains (13 strains; [Dataset S1](#)) were subjected to PacBio sequencing.  
237 DNA was extracted following the GES method (14) from fresh agar plate cultures to ensure good  
238 quality DNA with low fragmentation. Briefly, 2-4 mL of each bacterial strain was grown overnight in  
239 liquid TSB ([Table S3](#)) at 28 °C, centrifuged for 10 min at 12'396 x g at room temperature (20-22  
240 °C), the media was discarded, and the bacterial pellet was re-suspended in 200 µL TE buffer (10  
241 mM Tris-HCl, 1 mM EDTA, pH 8.0). For cell lysis 500 µL of GES solution (guanidium thiocyanate)

242 was added to each bacterial suspension and incubated for 10 min at RT, before the addition of 250  
243  $\mu\text{L}$  of 7.5 M ammonium acetate. The mixture was gently mixed and incubated on ice for 10 min.  
244 Thereafter, 500  $\mu\text{L}$  phenol chloroform isoamyl alcohol mixture, 25:24:1 (Sigma-Aldrich) was added,  
245 vigorously mixed, and centrifuged for 15 min at  $12'396 \times g$  at  $4^\circ\text{C}$ . The upper aqueous layer was  
246 transferred to a fresh tube and 500  $\mu\text{L}$  of chloroform isoamyl alcohol mixture 24:1 (Sigma-Aldrich)  
247 was added, vigorously mixed, and centrifuged for 15 min at  $12'396 \times g$  at  $4^\circ\text{C}$ . Once again, the  
248 upper layer of fluid was transferred to a new tube and mixed with 0.7 vol. 100% isopropanol, mixed  
249 well, and stored at  $-20^\circ\text{C}$  overnight. Precipitated DNA was recovered by centrifugation at  $12'000$   
250 rpm for 15 min at  $4^\circ\text{C}$ . The DNA pellet was washed once with 80% ethanol and twice with 70%  
251 ethanol. The pellet was dissolved slowly in 80  $\mu\text{L}$  water with the aid of heating at  $55^\circ\text{C}$  for 1 h. Prior  
252 to SMRTbell library preparation, bacterial genomic DNA was assessed for quantity, quality and  
253 purity using a Qubit 4.0 flurometer (Qubit dsDNA HS Assay kit; Thermo Fisher Scientific), an  
254 Advanced Analytical FEMTO Pulse instrument (Genomic DNA 165 kb Kit; Agilent) and a Denovix  
255 DS-11 UV-Vis spectrophotometer, respectively. Multiplexed SMRTbell libraries were prepared for  
256 sequencing on the Sequel exactly according to the PacBio guideline entitled: "Procedure &  
257 Checklist – Preparing Multiplexed Microbial Libraries Using SMRTbell® Express Template Prep Kit  
258 2.0" - Part Number 101-696-100 Version 08 (November 2021). Concisely, 1  $\mu\text{g}$  of gDNA in 100  $\mu\text{L}$   
259 was used to shear the gDNA using a Covaris g-TUBE (Covaris, Wolburn, US). Subsequently, the  
260 sheared gDNA was concentrated and cleaned using AMPure PB beads. The samples were then  
261 quantified and qualified to be in the range of 12-15 Kb using a Qubit 4.0 flurometer (Qubit dsDNA  
262 HS Assay kit, Thermo Fisher Scientific) and an Advanced Analytical FEMTO Pulse instrument  
263 (Genomic DNA 165 kb Kit, Agilent), respectively. The rest of the procedure as referenced above  
264 was followed including removal of single strand overhangs, DNA damage repair, end-repair & A-  
265 tailing, ligation of barcoded overhang adapters and then purification of the library using AMPure PB  
266 beads. The libraries were quality controlled using the steps described above and then were pooled  
267 using the PacBio microbial multiplexing calculator. Prior to and after size selection, the library pool  
268 was purified using AMPure PB beads. Size selection was performed a BluePippin instrument (Sage  
269 Science, Beverly, US) using BluePippin with dye free, 0.75% Agarose Cassettes and S1 Marker  
270 (Sage Science) wherein the selection cut-off was set at 6'000 bp. Library pool concentration and  
271 size was again assessed using a Thermo Fisher Scientific Qubit 4.0 flurometer and an Advanced  
272 Analytical FEMTO Pulse instrument (as described above), respectively. PacBio Sequencing primer  
273 v4 and Sequel DNA Polymerase 3.0 were annealed and bound, respectively, to the DNA template  
274 libraries. The polymerase binding time was 1 h and the complex was cleaned using 1.2 X AMPure  
275 PB beads. The libraries were loaded at an on-plate concentration of 150 pM using adaptive loading,  
276 along with the use of Spike-In internal control. SMRT sequencing was performed in CLR mode on  
277 the Sequel IIe with Sequel Sequencing kit 3.0, SMRT Cells 8M, a 2h pre-extension followed by a  
278 15 h movie time and via PacBio SMRT Link v10.1. Thereafter, the CCS generation and barcode  
279 demultiplexing workflow was run in SMRT Link v10.1. All steps from gDNA extraction to sequencing

280 data generation were performed at the Next Generation Sequencing Platform, University of Bern,  
281 Switzerland.

282 The raw sequencing data of all genomes is available from the European Nucleotide Archive  
283 (<http://www.ebi.ac.uk/ena>) with the study accession PRJEB65362 (sample IDs ERS16291034 to  
284 ERS16291087; [Dataset S1](#)).

## 285 **Genome assembly**

286 We utilized similar pipelines to assemble the genomes of all MRB strains. For set 1 (PacBio *and*  
287 Illumina sequence data), the fasta sequences of the 'continuous long reads' (CLRs), as extracted  
288 from the BAM files using samtools v. 1.10 (15), were used for assembly conducted with Flye v. 2.9  
289 (16). Since these strains were also sequenced on Illumina sequencers, the CLR assembly was  
290 corrected with Illumina reads. The reads were first mapped to the assembly using the Burrows-  
291 Wheeler Aligner BWA, v 0.7.8 (17). The resulting SAM file was then sorted and indexed using  
292 samtools v. 1.10 before using Pilon v. 1.24 (18) to correct the assemblies.

293 For sets 2 to 4 (generated on Illumina sequencers), the raw, paired end fastq sequences were  
294 trimmed using fastp v. 0.20.1 (19) with default options. Read quality was assessed with fastQC v.  
295 0.11.7 (7). These genomes were assembled using the SPAdes assembler v. 3.14.0 (20) with the  
296 options `--isolate -k 21,33,55,77,99,127 --cov-cutoff 'auto'`. The quality of the assemblies was  
297 assessed with Quast v. 4.6.0 (21), BUSCO v. 5.1.3 (22) and checked for contamination with  
298 ConFindr v. 0.7.2 (23). The genomes were then annotated with the NCBI procaryotic genome  
299 assembly pipeline PGAP, v. 2022-04-14 (24). The annotated genomes were functionally annotated  
300 with EggNog v. 5.0.1 (25) and orthologue genes were determined using OrthoFinder v. 2.3.8 (26).

301 The annotated assemblies were then integrated into a local instance of  
302 OpenGenomeBrowser (27) hosted at the Interfacility Bioinformatics Unit (University of Bern). The  
303 genome assemblies and annotations have been deposited at NCBI (<http://www.ncbi.nlm.nih.gov/>)  
304 under the BioProject ID PRJNA1009252 ([Dataset S1](#)).

305 **Supplementary Figures**

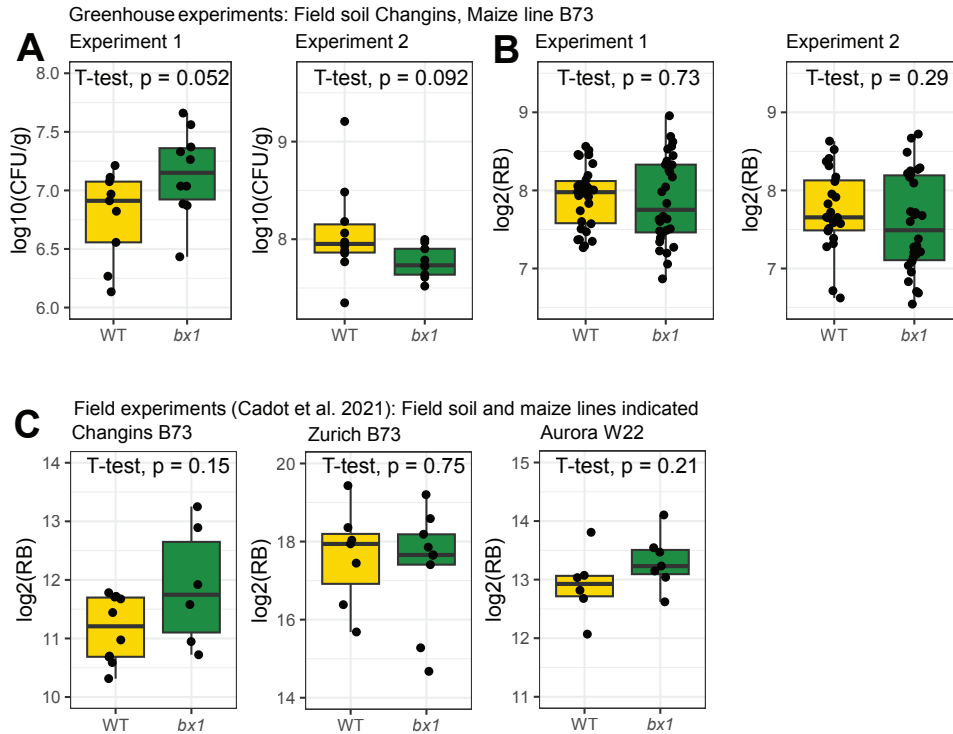

306

307 **Figure S1: Bacterial community size on maize roots by microbiological and qPCR analyses**

308 **A)** Bacterial root colonization was assessed by plating colony forming units (CFU) expressed as  
 309  $\log_{10}$  CFU / g roots and tested statistically for differences between wild-type and *bx1* plants.  
 310 Individual datapoints are shown ( $n = 9-10$ ) **B)** DNA extracts from the same plants were used for  
 311 qPCR analysis. The bacterial signal, derived from 16S rRNA primers 799F and 904R, was  
 312 normalized relative to the plant signal of the plant actin gene (*ZmActin1*) expressed as  $\log_2$ (RB),  
 313 RB = relative bacterial gene signal ( $E_{\text{plant gene}}^{Ct \text{ plant gene}} / E_{16S}^{Ct16S}$ ). Individual datapoints are shown  
 314 ( $n = 27-30$ , 9-10 samples with three technical replicates each). **C)** DNA extracts from maize roots  
 315 grown in three field experiments published in Cadot et. al. 2021. Individual datapoints are shown  
 316 (WT Changins  $n = 10$ , *bx1* Changins  $n = 6$ , WT Zurich  $n = 7$ , *bx1* Zurich  $n = 9$ , WT Aurora  $n = 6$ ,  
 317 *bx1*, Aurora  $n = 7$ . Results from t-test between wild-type and *bx1* are shown in the panels.

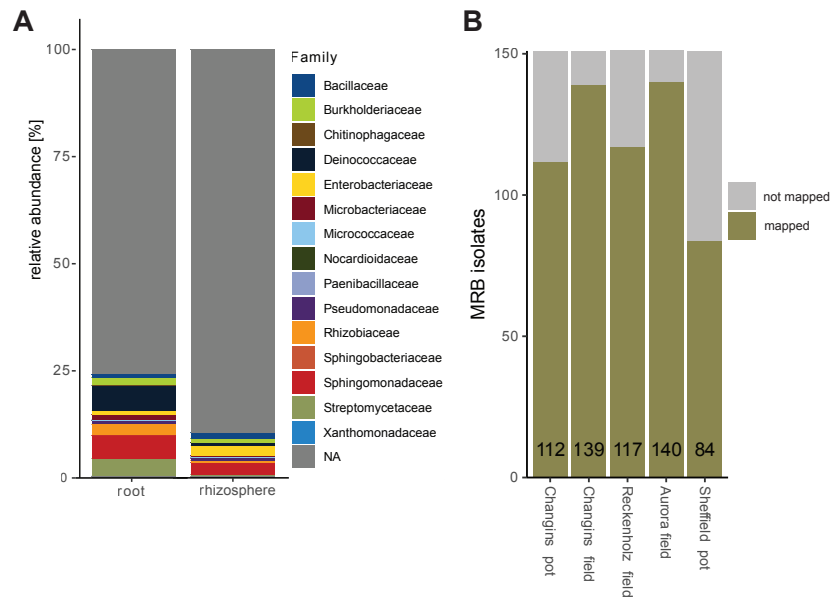

318

319 **Figure S2: Mapping of MRB strains to maize root and rhizosphere microbiome datasets**

320 **A)** Cumulative abundance of MRB strains, reported at family level, in the root and rhizosphere  
 321 profiles of wild-type B73 maize plants, from which the MRB strains were isolated from. This was a  
 322 greenhouse experiment with pots filled with natural field soil from the Changins site. The  
 323 microbiome data corresponds to the feedback experiment reported in Hu et al. 2018. **B)** Number  
 324 of MRB isolates mapping to abundant community members (> 0.1% abundance) in root microbiome  
 325 datasets of maize grown in greenhouse and field experiments (Changins field data from Hu et al.  
 326 2018; Reckenholz and Aurora data from Cadot et al. 2021) or a greenhouse experiment with field  
 327 soil (Sheffield data from Cotton et al. 2019).



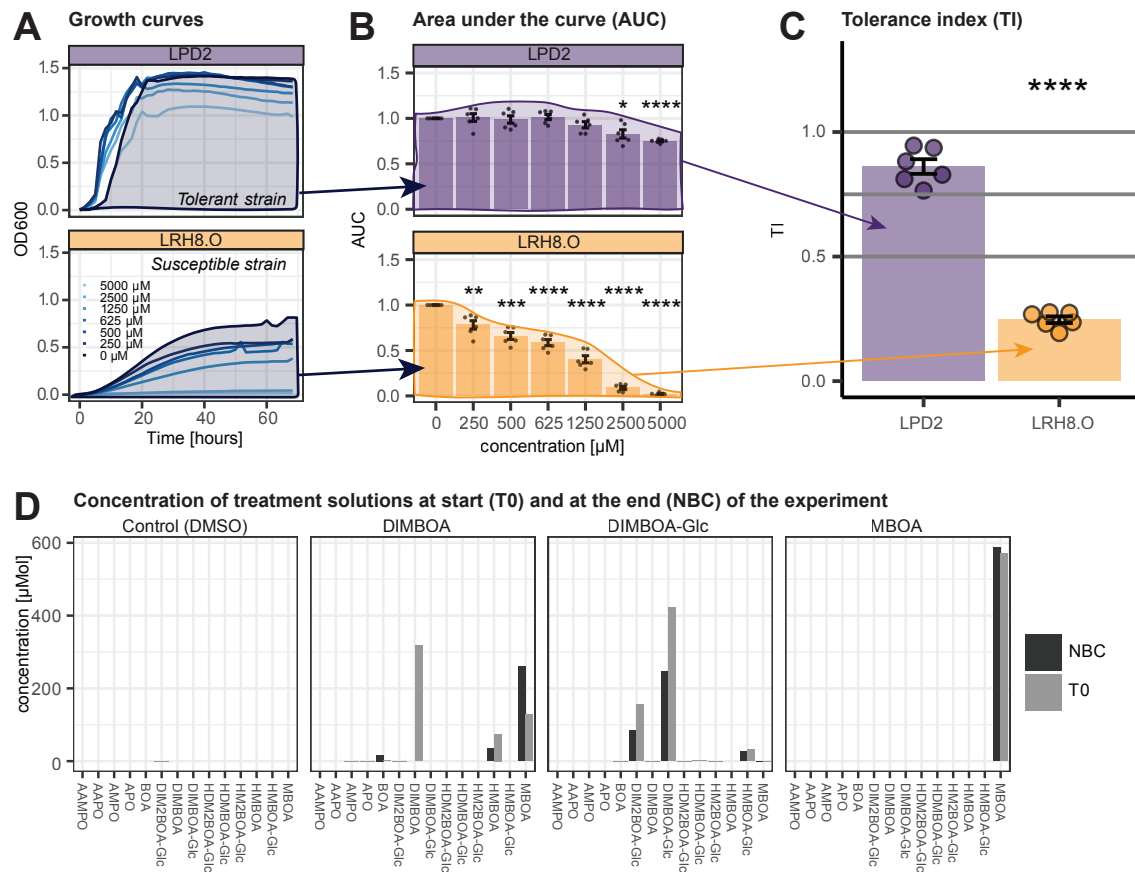

328

329 **Figure S3: *In vitro* growth of maize root bacteria in MBOA and stability of benzoxazinoids in**  
 330 **culture medium**

331 **A)** Bacterial growth curves (OD<sub>600</sub>) of a representative tolerant strain of Pseudomonadaceae  
 332 (LPD2) and a representative susceptible strain of Rhizobiaceae (LRH8.O) at different  
 333 concentrations of MBOA over a time course of 68 hours. **B)** Area under the curve (AUC),  
 334 normalized to the BX-free control treatment **C)** Tolerance index (TI). Means  $\pm$  SE bar graphs and  
 335 individual datapoints are shown (n = 6). Results of pairwise t-test is shown inside the panels, p-  
 336 value < 0.05 = \*. **D)** We screened the treatment solutions of DIMBOA, DIMBOA-Glc and MBOA for  
 337 all benzoxazinoid and aminophenoxazinone compounds of which we had standards. Graphs report  
 338 the measured concentrations at the start (T0) and 68 h later at the end of the experiment (NBC).

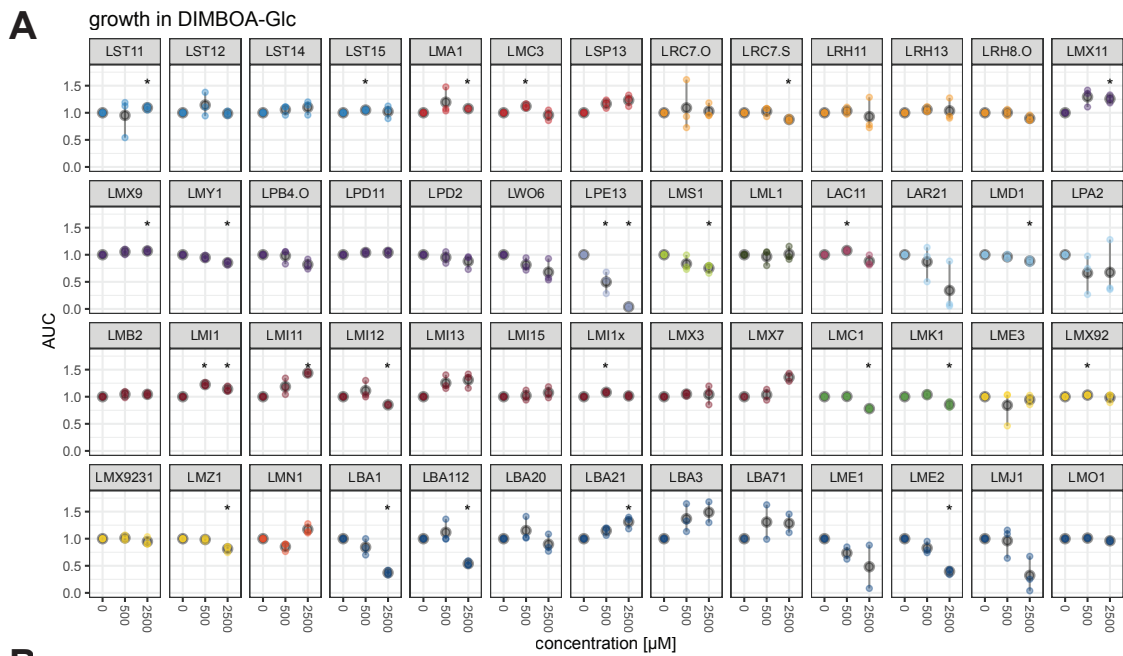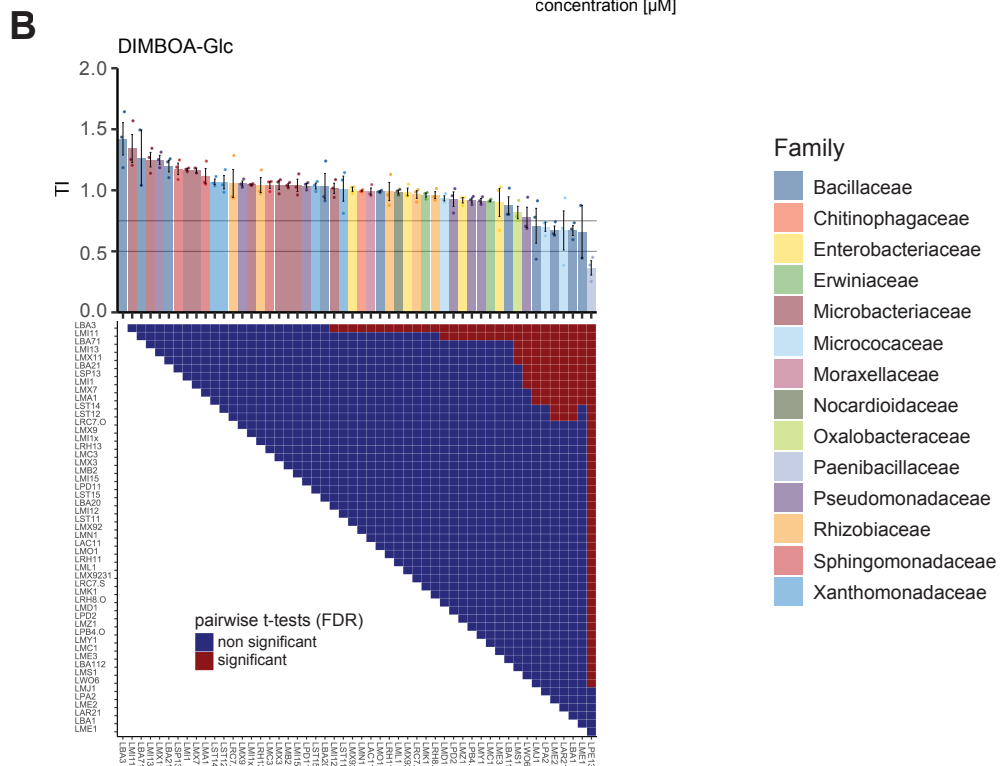

339

340 **Figure S4: Screening maize root bacteria for tolerance to DIMBOA-Glc**

341 **A)** Growth measured as area under the curve (AUC) of maize root bacteria in 0, 500 and 2'500  $\mu\text{M}$   
 342 of DIMBOA-Glc. Data points are replicate measurements ( $n = 3$ ). Statistical analysis relative to the  
 343 0  $\mu\text{M}$  control (t-test, asterisks denote significance:  $p < 0.05^*$ ). **B)** The upper panel repeats the  
 344 tolerance TI data of the main figure and the lower panel displays the corresponding statistical  
 345 analysis with all strain-to-strain comparisons (pairwise t-tests, FDR adjusted p-values, non-  
 346 significant ( $p > 0.05$ ) and significant ( $p < 0.05$ ) differences are in blue and red, respectively. Colors  
 347 by family taxonomy.

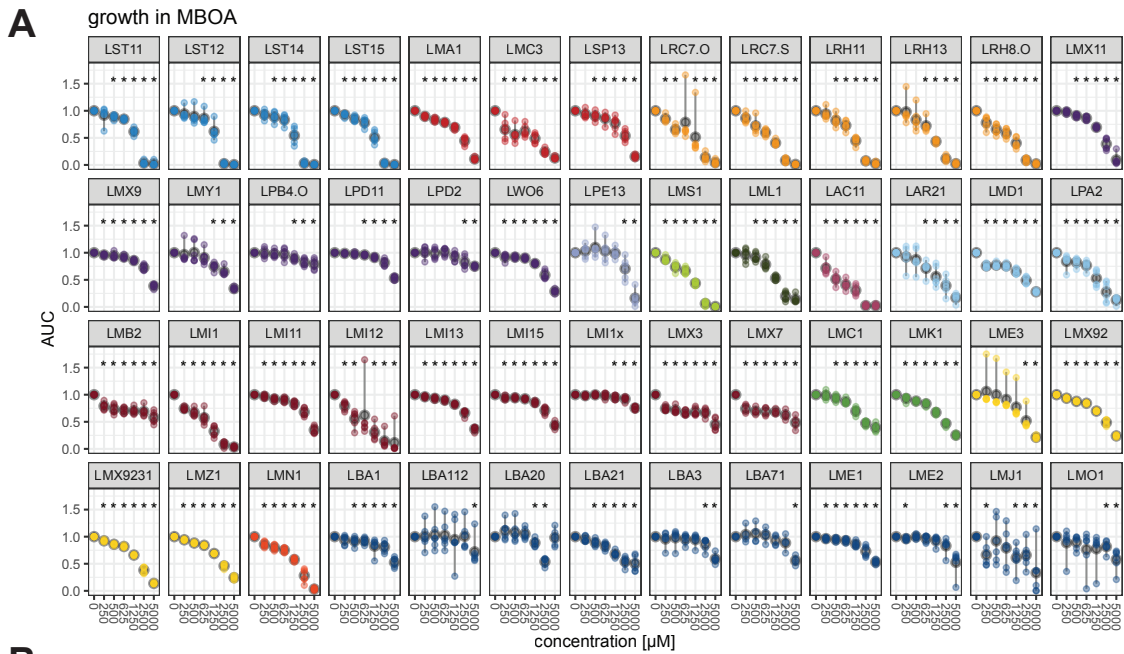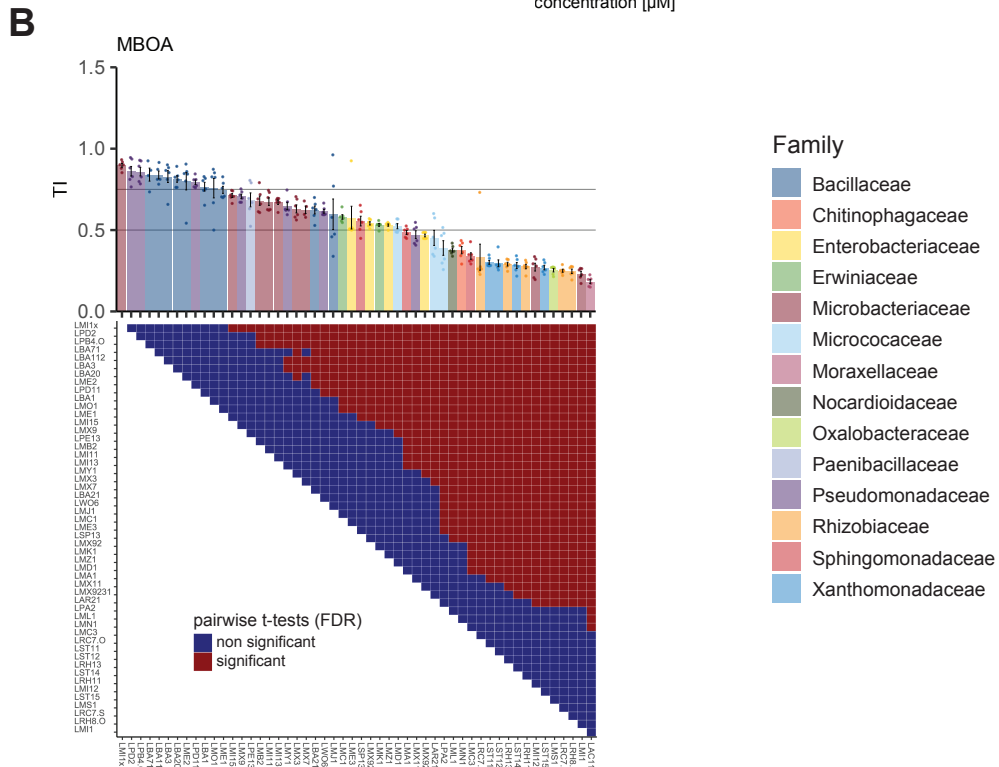

348

349 **Figure S5: Screening of maize root bacteria for tolerance to MBOA**

350 **A)** Growth measured as area under the curve (AUC) of maize root bacteria in 0 - 5'000  $\mu\text{M}$  MBOA.  
 351 Data points are individual measurements ( $n = 6$ ). Statistical analysis relative to the 0  $\mu\text{M}$  control (t-  
 352 test, asterisks denote significance:  $p < 0.05^*$ ). **B)** The upper panel repeats the tolerance TI data of  
 353 the main figure and the lower panel displays the corresponding statistical analysis with all strain-  
 354 to-strain comparisons (pairwise t-tests, FDR adjusted p-values, non-significant ( $p > 0.05$ ) and  
 355 significant ( $p < 0.05$ ) differences are in blue and red, respectively. Colors by family taxonomy.

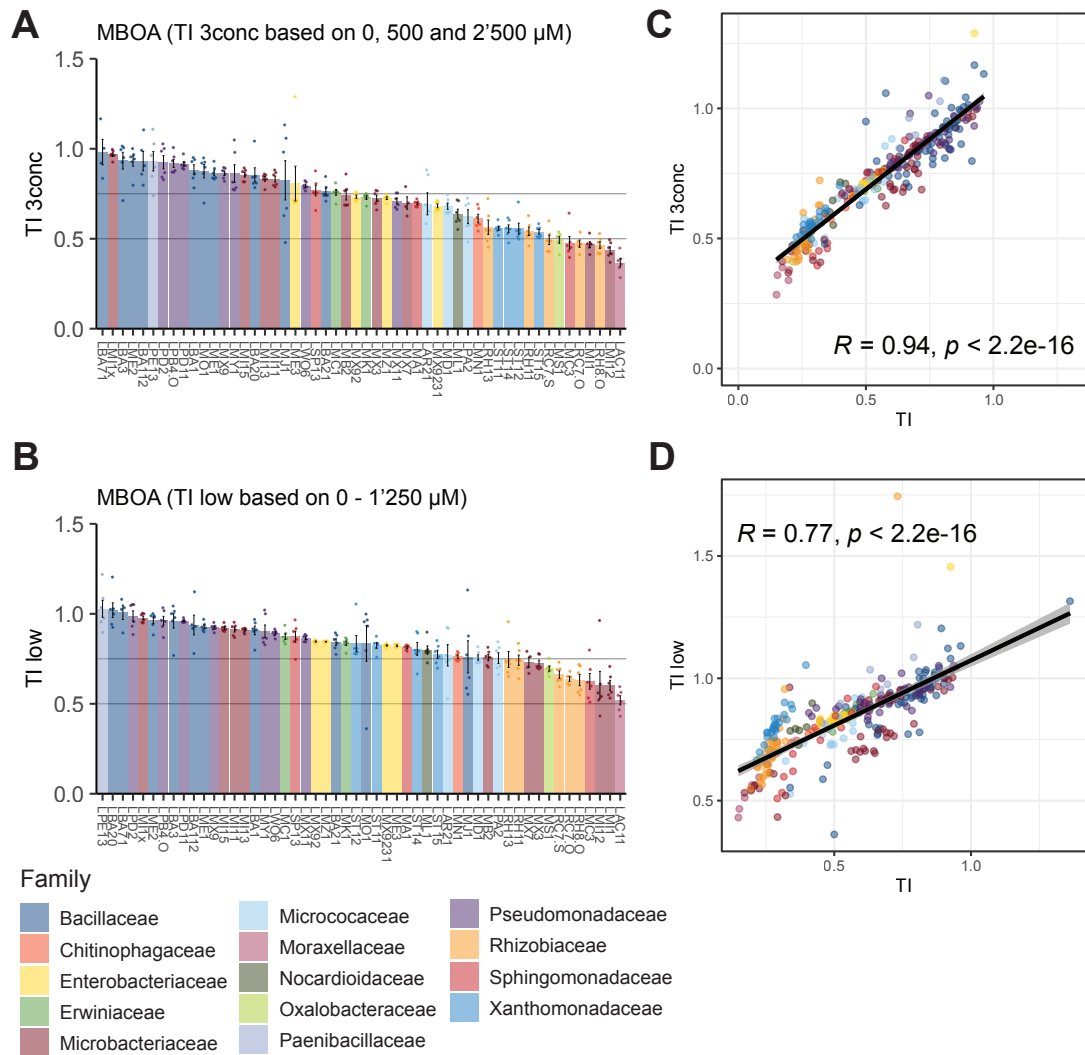

356

357 **Figure S6: Validation of tolerance index approach**

358 Robustness of TI-based findings were tested if they were affected by the number of concentrations  
 359 used for calculation and whether the TI was primarily driven by very high concentrations. **A)** Each  
 360 bacterium's tolerance to MBOA was re-calculated either only based on 3 concentrations (0, 500,  
 361 2'500  $\mu\text{M}$  MBOA; defined as  $\text{TI}_{3\text{conc}}$ ) or **B)** excluding data of the two highest concentrations (0 -  
 362 1'250  $\mu\text{M}$  MBOA; defined as  $\text{TI}_{\text{low}}$ ). Bargraphs report means  $\pm\text{SE}$  ( $n = 6$ ). Correlations between **C)**  
 363  $\text{TI}_{3\text{conc}}$  and **D)**  $\text{TI}_{\text{low}}$  with the with the original TI reported in Fig. 2B with their correlation coefficient  
 364  $R$  and  $p$ -value of the Pearson's product-moment test inside the panels. Colors by family taxonomy.

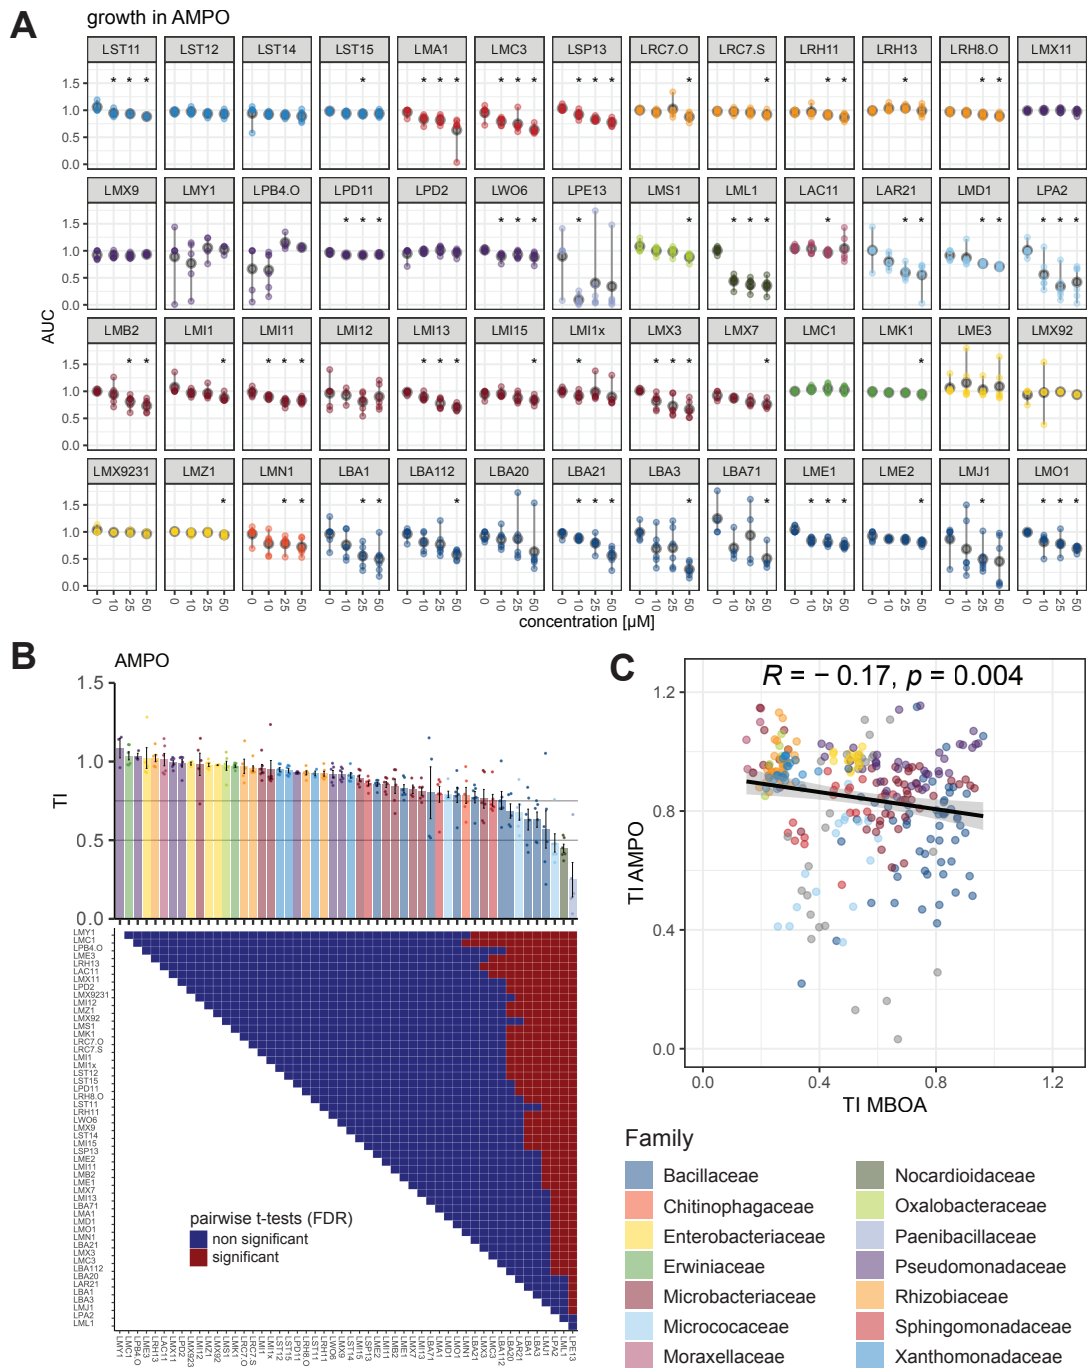

365

366 **Figure S7: Screening of maize root bacteria for tolerance to AMPO**

367 **A)** Growth measured as area under the curve (AUC) of maize root bacteria in 0, 10, 25 and 50  $\mu\text{M}$   
 368 AMPO. Data points are individual measurements ( $n = 6$ ). Statistical analysis relative to the 0  $\mu\text{M}$   
 369 control (t-test, asterisks denote significance:  $p < 0.05^*$ ). **B)** The upper panel repeats the tolerance  
 370 TI data of the main figure and the lower panel displays the corresponding statistical analysis with  
 371 all strain-to-strain comparisons (pairwise t-tests, FDR adjusted p-values, non-significant ( $p > 0.05$ )  
 372 and significant ( $p < 0.05$ ) differences are in blue and red, respectively. **C)** Correlation between TIs  
 373 of AMPO and MBOA with their correlation coefficient  $R$  and  $p$ -value of the Pearson's product-  
 374 moment test inside the panel. Colors by family taxonomy.

Growth in 50  $\mu$ M MBOA

Growth in 50  $\mu$ M AMPO

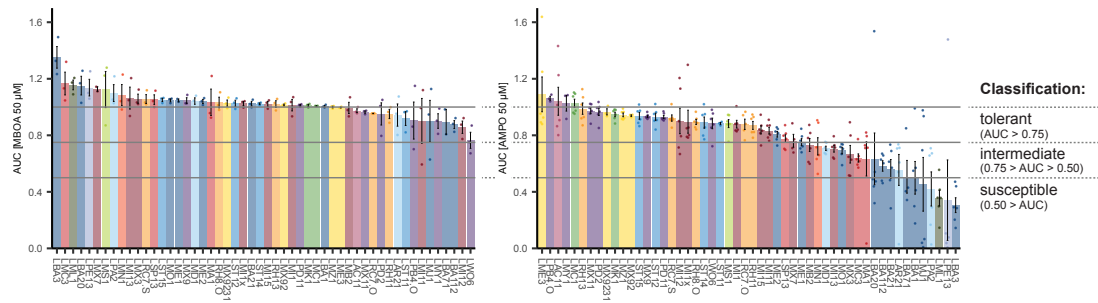

Family

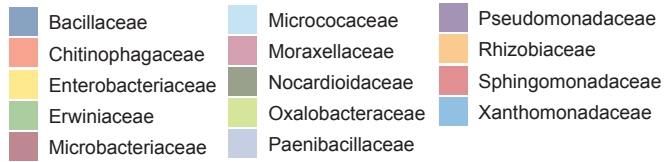

375

376 **Figure S8: Growth of maize root bacteria in equimolar MBOA and AMPO**

377 Direct comparison of growth (as area under the curve AUC) in 50  $\mu$ M MBOA and 50  $\mu$ M AMPO.  
 378 Data points are individual measurements (n = 6). Strains were classified as tolerant (AUC > 0.75),  
 379 intermediately tolerant (0.75 > AUC > 0.50) or susceptible (0.50 > AUC). Colors by family taxonomy.

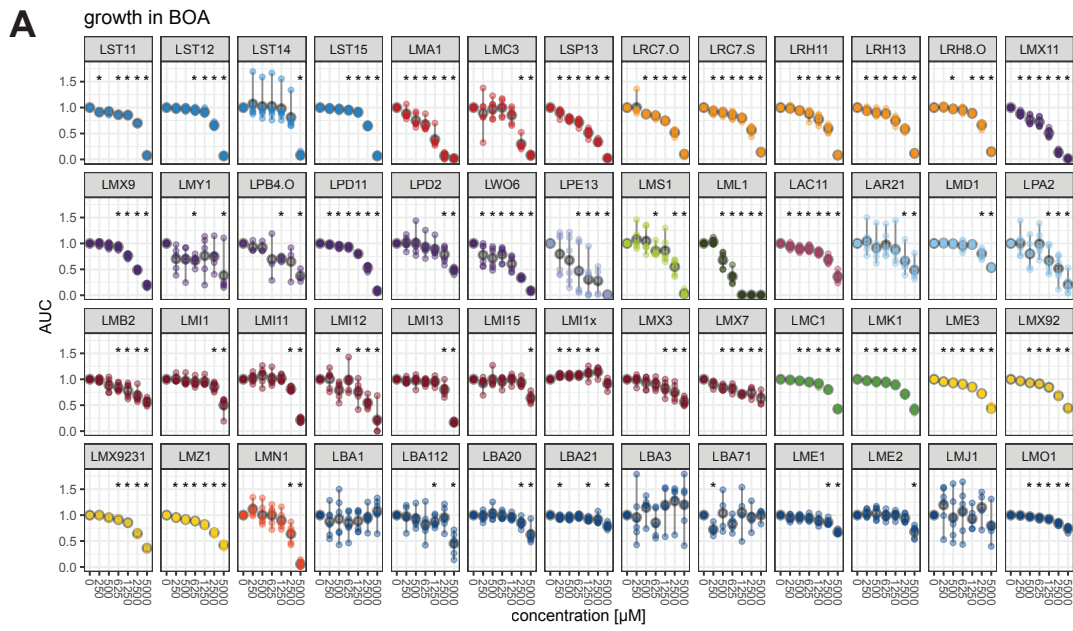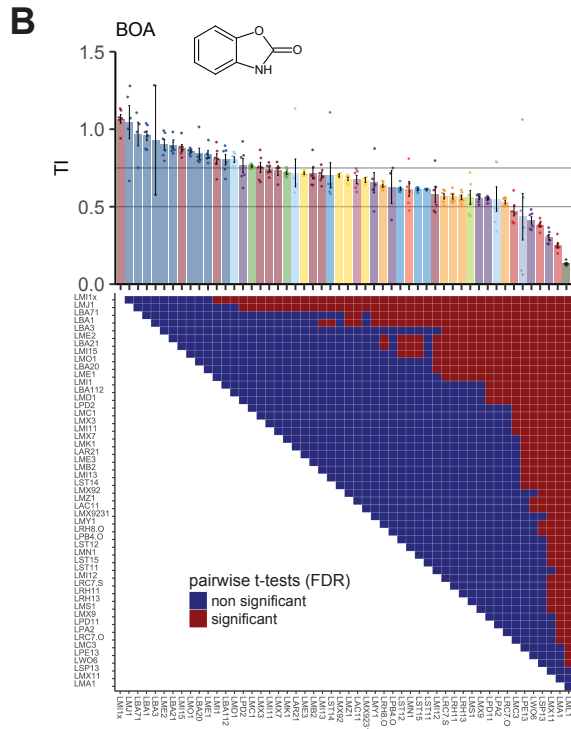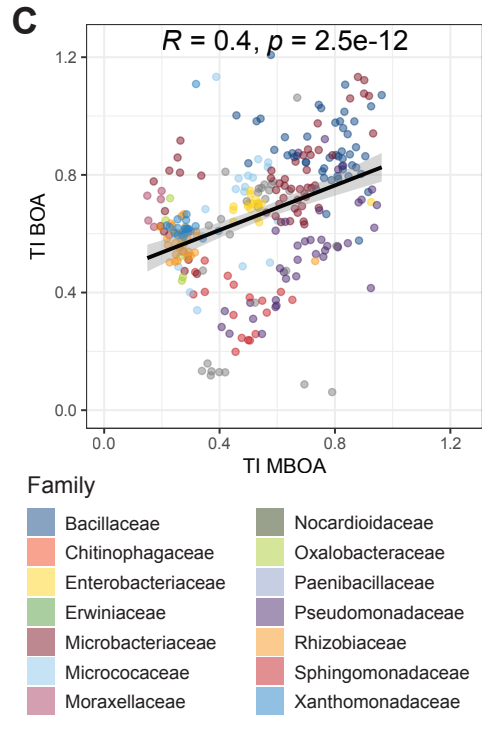

380

381 **Figure S9: Screening of maize root bacteria for tolerance to BOA**

382 BOA is the non-methoxylated relative compound of MBOA. **A)** Growth measured as area under the  
 383 curve (AUC) of maize root bacteria in 0 - 5'000 µM BOA. Data points are individual measurements  
 384 (n = 6). Statistical analysis relative to the 0 µM control (t-test, asterisks denote significance: p <  
 385 0.05\*). **B)** The upper panel reports the tolerance TI data (mean ±SE, n = 6) and the lower panel  
 386 displays the corresponding statistical analysis with all strain-to-strain comparisons (pairwise t-tests,  
 387 FDR adjusted p-values, non-significant (p > 0.05) and significant (p < 0.05) differences are in blue  
 388 and red, respectively. **C)** Correlation between TIs of BOA and MBOA with their correlation  
 389 coefficient R and p-value of the Pearson's product-moment test inside the panel. Colors by family  
 390 taxonomy.



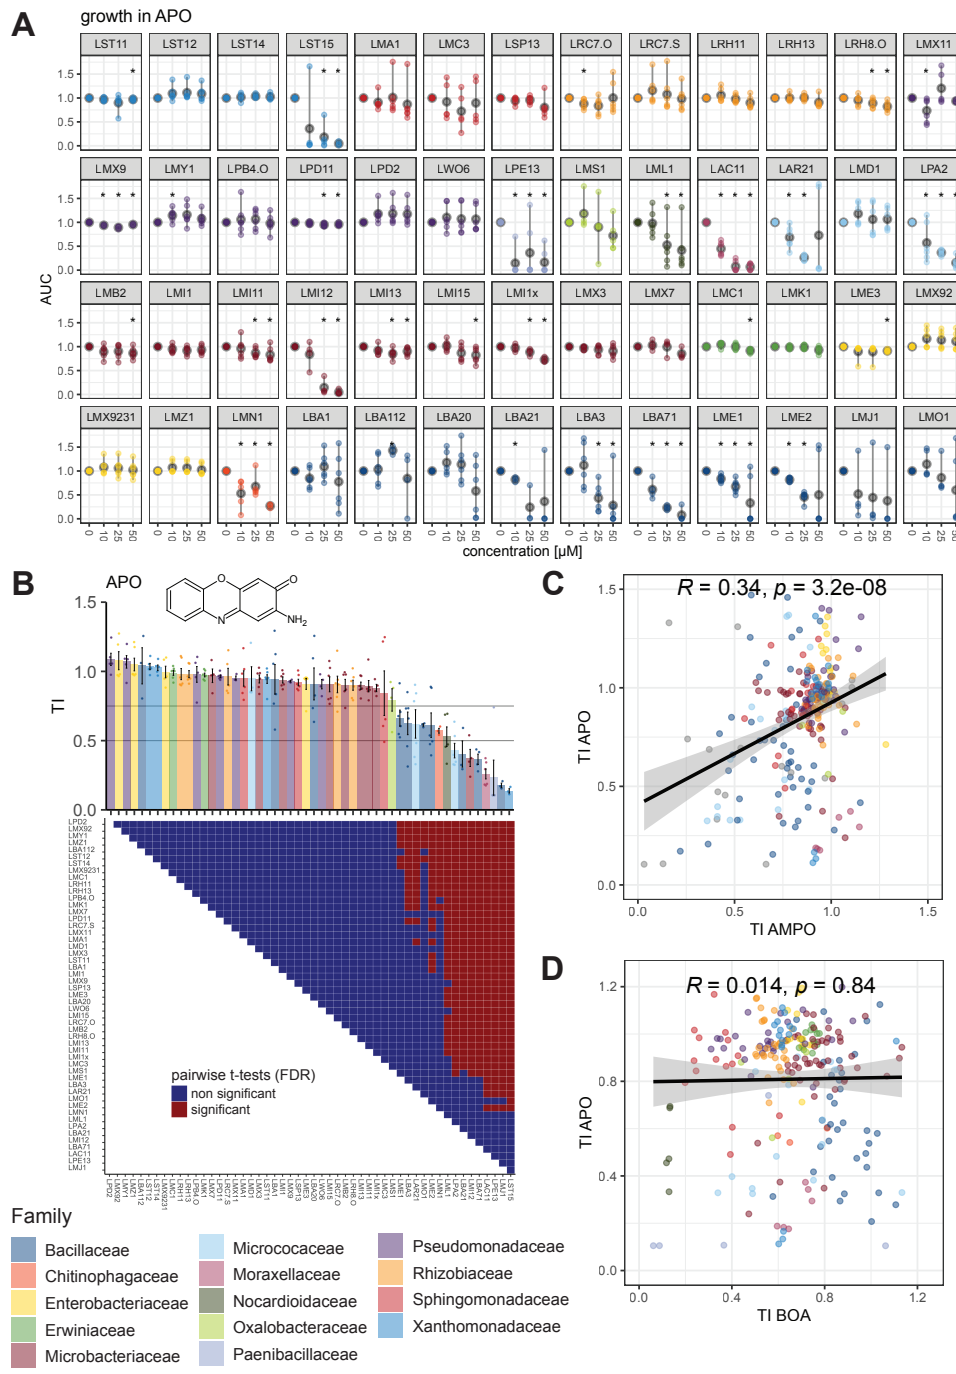

391

392 **Figure S10: Screening of maize root bacteria for tolerance to APO**

393 APO is the non-methoxylated relative compound of AMPO, both are aminophenoxazinones. **A)**  
 394 Growth measured as area under the curve (AUC) of maize root bacteria in 0, 10, 25 and 50  $\mu\text{M}$   
 395 APO. Data points are individual measurements ( $n = 6$ ). Statistical analysis relative to the 0  $\mu\text{M}$   
 396 control (t-test, asterisks denote significance:  $p < 0.05^*$ ). **B)** The upper panel reports the tolerance  
 397 TI data (mean  $\pm$ SE,  $n = 6$ ) and the lower panel displays the corresponding statistical analysis with  
 398 all strain-to-strain comparisons (pairwise t-tests, FDR adjusted p-values, non-significant ( $p > 0.05$ )  
 399 and significant ( $p < 0.05$ ) differences are in blue and red, respectively. Correlations between TIs of  
 400 **C)** APO and AMPO and **D)** APO and BOA with their correlation coefficient  $R$  and  $p$ -value of the  
 401 Pearson's product-moment test inside the panels. Colors by family taxonomy.

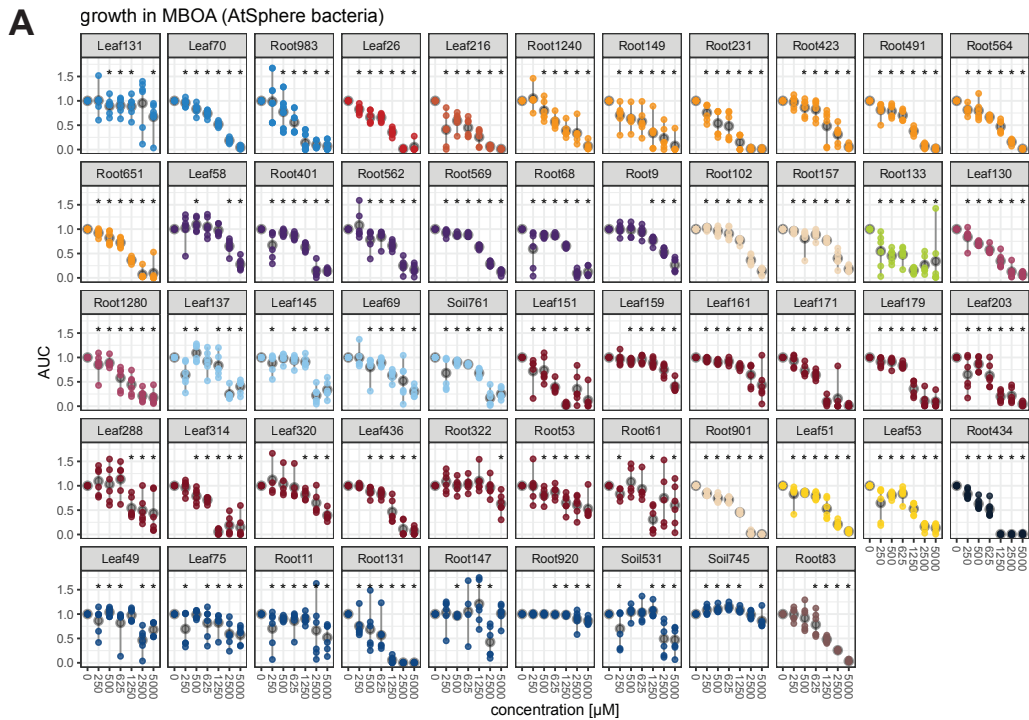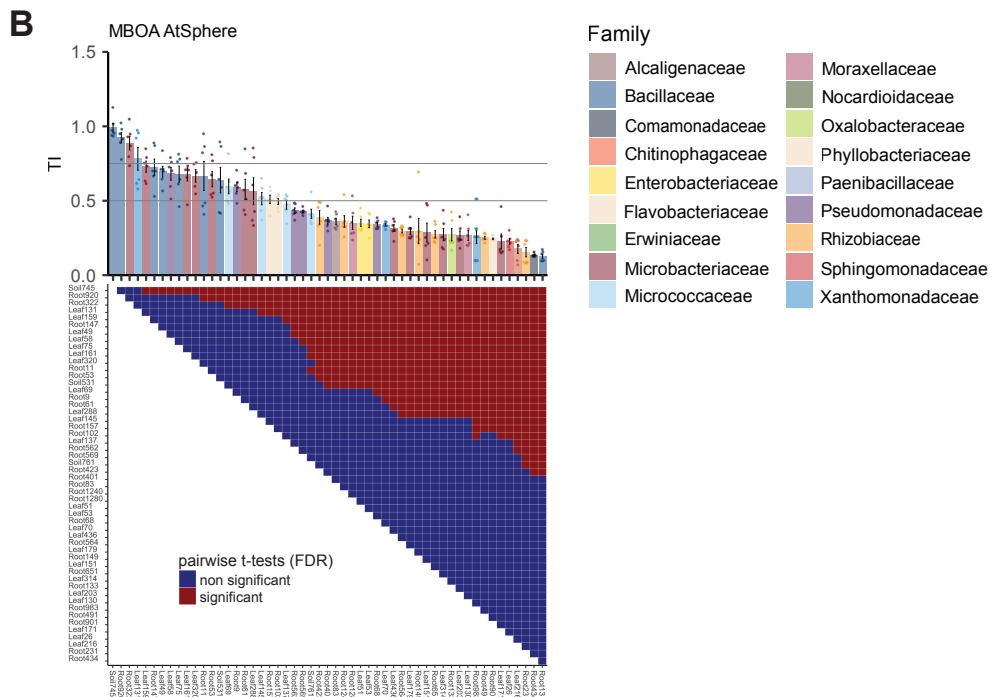

402

403 **Figure S11: Screening of Arabidopsis bacteria for tolerance to MBOA**

404 **A)** Growth measured as area under the curve (AUC) of AtSphere bacteria in 0 – 5'000 μM MBOA.  
 405 Data points are individual measurements (n = 6). Statistical analysis relative to the 0 μM control (t-  
 406 test, asterisks denote significance: p < 0.05\*). **B)** The upper panel repeats the tolerance TI data of  
 407 the main figure and the lower panel displays the corresponding statistical analysis with all strain-  
 408 to-strain comparisons (pairwise t-tests, FDR adjusted p-values, non-significant (p > 0.05) and  
 409 significant (p < 0.05) differences are in blue and red, respectively. Colors by family taxonomy.

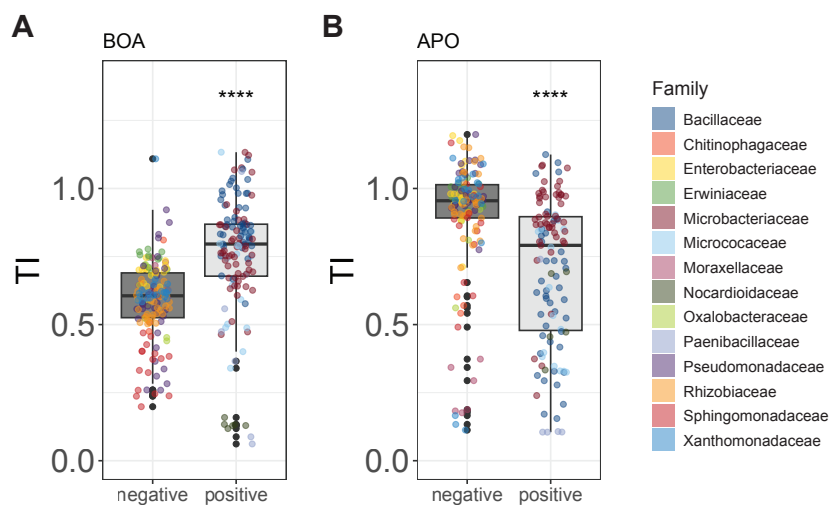

410

411 **Figure S12: Tolerance of gram-negative vs. gram positive maize root bacteria**

412 The tolerance indices (TIs) to **A**) BOA and **B**) APO are summarized for gram-negative and gram-

413 positive maize root bacteria. Graphs report six measurements per strain and statistical analysis (t-

414 test, asterisks denote significance:  $p < 0.0001$ \*\*\*\*). Colors by family taxonomy.

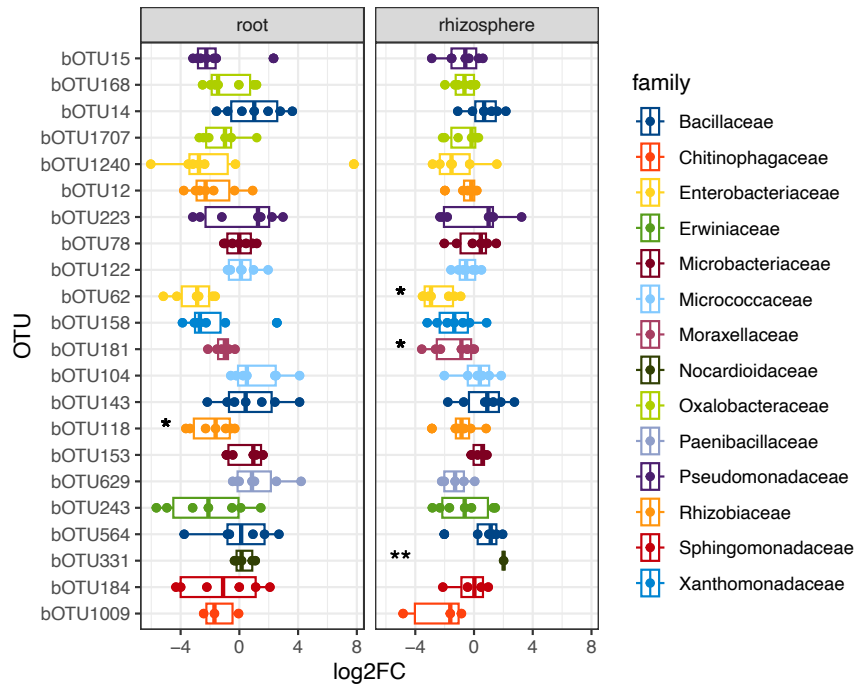

415

416 **Figure S13: Differential abundance of OTUs corresponding to MRB strains on roots and in**  
 417 **rhizosphere profiles of maize**

418 MRB isolates were mapped to the bacterial operational taxonomic units (bOTUs) of the microbiome  
 419 dataset of Hu et al. 2018. In this study, wild-type and *bx1* mutant maize lines were grown in a field  
 420 experiment in Changins from where the soil was used for the isolation experiments. Differential  
 421 abundance (i.e., the log<sub>2</sub> fold change; log<sub>2</sub>FC) between wild-type and *bx1* plants was calculated  
 422 for each bOTU on roots (n=7) and in the rhizosphere (n=7) microbiome profiles. Log<sub>2</sub>FC > 1 denote  
 423 enrichment, while values < 1 refer to depletion on wild-type plants. Statistical analysis based on t-  
 424 tests (asterisks denote significance: p < 0.05\*). Colors by family taxonomy.

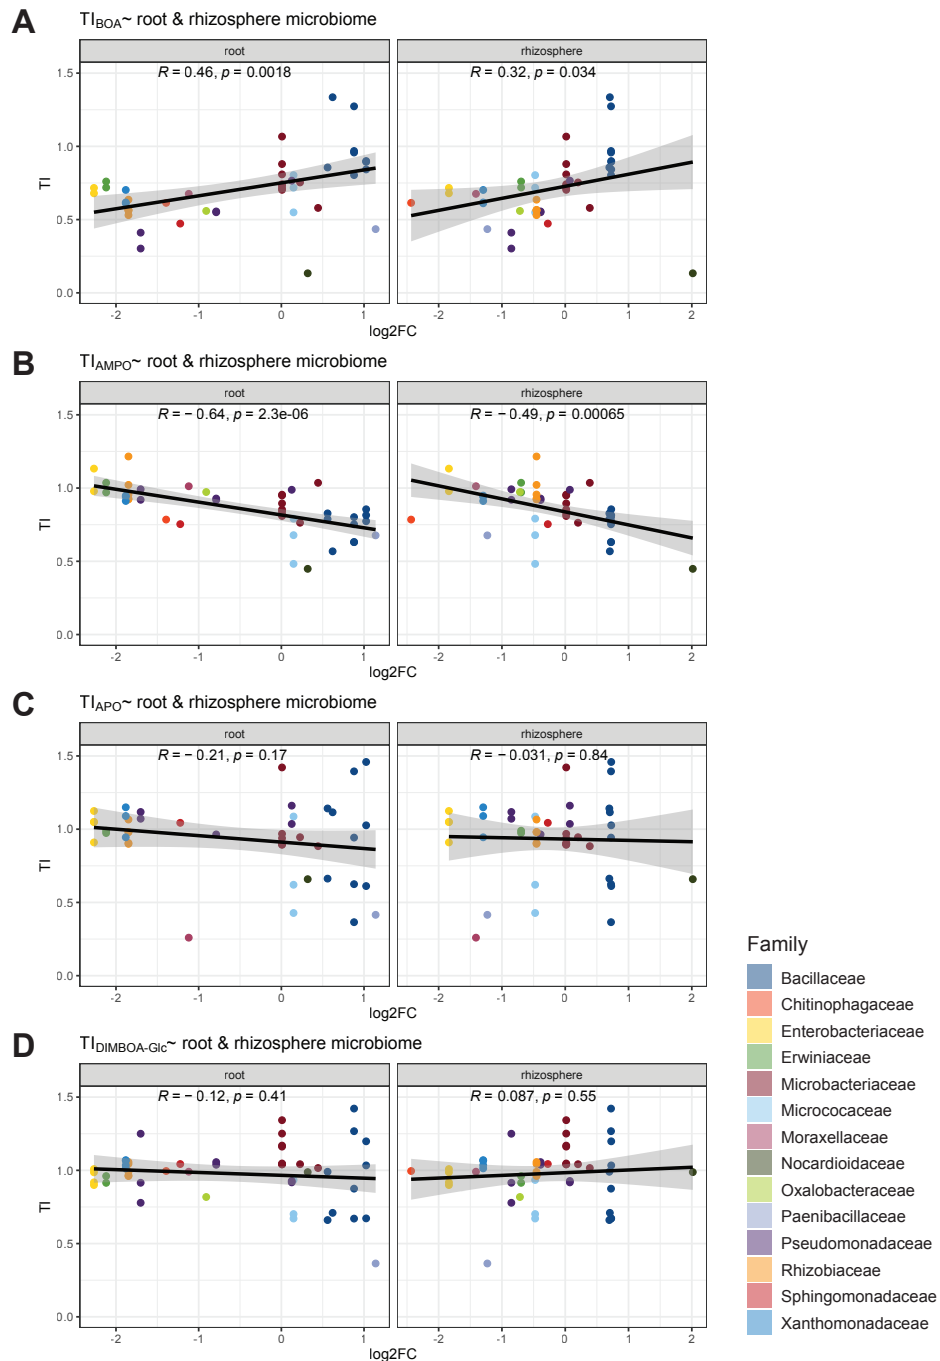

425

426 **Figure S14: Correlations between in vitro tolerance and abundance in root and rhizosphere**  
 427 **microbiomes of maize**

428 Correlations between the tolerance indices (TIs) of the MRB strains with the abundance changes  
 429 (log<sub>2</sub>FC, wild-type vs. *bx1*) of their corresponding OTUs in root and in rhizosphere  
 430 profiles. This analysis was performed with the TIs of **A)** BOA, **B)** AMPO, **C)** APO and **D)**  
 431 DIMBOA-Glc. The correlation coefficient *R* and the *p*-value of the Pearson's product-moment  
 432 correlation test are reported inside the panels. Each data point reports the mean TI of a strain  
 433 (means are based on n=6 replicates for BOA, AMPO and APO and n=3 for DIMBOA-Glc); colors  
 434 by family taxonomy.

435 **Supplementary Tables**436 **Table S1: Abbreviation benzoxazinoid metabolites**

| Abbreviation | Full name                                                                                              | Class                     | Mass<br>[g/mol] | Formula                                                        | Concentration              |                              |
|--------------|--------------------------------------------------------------------------------------------------------|---------------------------|-----------------|----------------------------------------------------------------|----------------------------|------------------------------|
|              |                                                                                                        |                           |                 |                                                                | Rhizosphere<br>[µg/kg FW]* | Root exudates<br>[µg/kg FW]* |
| AAMPO        | 2-acetylamino-7-methoxy-phenoxazin-3-one                                                               | Amino-phenoxazine         | 284.27          | C <sub>15</sub> H <sub>12</sub> N <sub>2</sub> O <sub>4</sub>  | ND                         | ND                           |
| AMPO         | 2-amino-7-methoxy-phenoxazin-3-one                                                                     | Amino-phenoxazine         | 242.23          | C <sub>13</sub> H <sub>10</sub> N <sub>2</sub> O <sub>3</sub>  | 0.39±0.10                  | ND                           |
| DIMBOA       | 2,4-dihydroxy-7-methoxy-1,4-benzoxazin-3-one                                                           | Benzoxazinone             | 211.17          | C <sub>9</sub> H <sub>9</sub> N <sub>2</sub> O <sub>5</sub>    | 0.57±0.33                  | 0.05±0.016                   |
| DIMBOA-Glc   | 4-hydroxy-7-methoxy-2-[3,4,5-trihydroxy-6-(hydroxymethyl)oxan-2-yl]oxy-1,4-benzoxazin-3-one            | Benzoxazinone glucoside   | 373.31          | C <sub>15</sub> H <sub>19</sub> N <sub>2</sub> O <sub>10</sub> | ND                         | <b>0.09±0.01</b>             |
| HDM2BOA-Glc  | 2-(2-hydroxy-4,7,8-trimethoxy-1,4-benzoxazin-3-one)-β-d-glucopyranose                                  | Benzoxazolinone glucoside | 417.4           | C <sub>17</sub> H <sub>23</sub> N <sub>2</sub> O <sub>11</sub> | 0.27±0.09                  | 0.00±0.00                    |
| HDMBOA-Glc   | 4,7-dimethoxy-2-[[3,4,5-trihydroxy-6-(hydroxymethyl)oxan-2-yl]oxy]-3,4-dihydro-2H-1,4-benzoxazin-3-one | Benzoxazolinone glucoside | 387.34          | C <sub>16</sub> H <sub>21</sub> N <sub>2</sub> O <sub>10</sub> | 2.80±0.92                  | 0.03±0.005                   |
| HMBOA-Glc    | 2-O-Glucosyl-7-methoxy-1,4(2H)-benzoxazin-3-one                                                        | Benzoxazinone glucoside   | 357.31          | C <sub>15</sub> H <sub>19</sub> N <sub>2</sub> O <sub>9</sub>  | 1.60±0.33                  | 0.004±0.001                  |
| MBOA         | 6-methoxybenzoxazolin-2(3H)-one                                                                        | Benzoxazolinone           | 165.15          | C <sub>8</sub> H <sub>7</sub> N <sub>2</sub> O <sub>3</sub>    | <b>5.62±1.39</b>           | 0.002±0.0004                 |

437  
438

\*Measurements from Supplementary Figures S1A & B of Hu et al. 2018, ND = not detected. Most abundant compounds are marked in bold.

439 **Table S2: Experiments and plant growth conditions**

| Experiment                       | Changins soil* | Plant growth**                         | Isolation media***       | Comment            |
|----------------------------------|----------------|----------------------------------------|--------------------------|--------------------|
| Isolation 1                      | Summer 2014    | 10 weeks (no fertilization), setting 1 | FlourA, PseudoA          | re-streaked on LB  |
| Isolation 2                      | Spring 2019    | 14 weeks (full period), setting 2      | 1/10 TSB MBOA            | re-streaked on TSA |
| Isolation 3                      | Spring 2019    | 12 weeks (only weeks 1-5), setting 2   | 1/10 TSB MBOA            | re-streaked on TSA |
| Isolation 4 and community size 2 | Winter 2019    | 7 weeks (full period), setting 2       | 1/10 TSB & 1/10 TSB MBOA | re-streaked on TSA |
| Isolation 5                      | Spring 2019    | 12 weeks (full period), setting 2      | 1/10 TSB MBOA            | re-streaked on TSA |
| Community size 1                 | Summer 2019    | 6 weeks (full period), setting 2       | NA                       | NA                 |

440 \* Batches of Changins soil: the 'Summer 2014' batch corresponds to original study (2)

441 \*\* Plant growth: age of harvested plants, period of fertilization (weeks 1 – 4: 100 ml; 0.2% Plantactive Typ K (Hauert HBG  
 442 Duenger AG, Grossaffoltern, Switzerland), 0.0001% Sequestrene Rapid (Maag, Westland Schweiz GmbH, Dielsdorf,  
 443 Switzerland); weeks 5 onwards: 200 ml; 0.2% Plantactive Typ K, 0.02% Sequestrene Rapid) and greenhouse settings  
 444 (Settings 1: 14:10 h light/dark, 26 °C ± 2 °C, 55% relative humidity, 50'000 lm m<sup>-2</sup>; Setting 2: 16:8 light/dark, 26/23 °C,  
 445 50% relative humidity, ~550 μmol m<sup>-2</sup>s<sup>-1</sup> light).

446 \*\*\* see [Table S4](#)



447 **Table S3: PCR primer sequences**

| Name        | Target                  | Direction | Sequence 5'-3'           | Reference |
|-------------|-------------------------|-----------|--------------------------|-----------|
| 27f         | Bacterial 16S rRNA gene | forward   | AGAGTTTGATCCTGGCTCAG     | (28)      |
| 1492r       | Bacterial 16S rRNA gene | reverse   | GGTACCTTGTTACGACTT       |           |
| ZmActin1_F  | Maize Actin gene        | forward   | CCAGAGGCCACGTACAAC       | (29)      |
| ZmActin1_R1 | Maize Actin gene        | reverse   | GGTAAAACCCCACTGAGGA      |           |
| 799F        | Bacterial 16S rRNA gene | forward   | AACMGGATTAGATACCKG       | (30)      |
| 904R        | Bacterial 16S rRNA gene | reverse   | CCCCGTCAATTCITTTGAGTTYAR |           |

448

**Table S4: Media uses for isolation of maize root bacteria**

| Medium*        | Type   | Ingredients (source)                                                                                                                                                                                                                                  | Supplements** (source)                                                          |
|----------------|--------|-------------------------------------------------------------------------------------------------------------------------------------------------------------------------------------------------------------------------------------------------------|---------------------------------------------------------------------------------|
| FlourA<br>(31) | solid  | 6 g/L corn starch (Sigma-Aldrich)<br>0.3 g/L yeast extract (Duchefa Biochemie,<br>Haarlem, Netherlands)<br>0.3 g/L sucrose (Fluka Chemie GmbH, Buchs,<br>Switzerland)<br>0.3 g/L CaCO <sub>3</sub> (Fluka Chemie GmbH)<br>18 g/L agar (Sigma-Aldrich) | 10 mg/mL Cycloheximide (Sigma-Aldrich)                                          |
| PseudoA        | solid  | 45 g/L Pseudomonas Isolation Agar<br>(Difco, Le pont de Claix, France)                                                                                                                                                                                | 40 µg/mL Ampicillin (Sigma-Aldrich)<br>13 µg/mL Chloramphenicol (Sigma-Aldrich) |
| LB             | liquid | 25 g/L Luria-Bertani broth (Carl Roth,<br>Karlsruhe, D)                                                                                                                                                                                               | -                                                                               |
| LBA            | solid  | 40 g/L Luria-Bertani agar (Carl Roth)                                                                                                                                                                                                                 | -                                                                               |
| TSB            | liquid | 30 g/L tryptic soy medium (Sigma-Aldrich)                                                                                                                                                                                                             | -                                                                               |
| TSA            | solid  | 30 g/L tryptic soy medium (Sigma-Aldrich)<br>15 g/L agar (Sigma-Aldrich)                                                                                                                                                                              |                                                                                 |
| 50% TSB        | liquid | 15 g/L tryptic soy medium (Sigma-Aldrich)                                                                                                                                                                                                             | -                                                                               |
| 50% TSA        | solid  | 15 g/L tryptic soy medium (Sigma-Aldrich)<br>15 g/L agar (Sigma-Aldrich)                                                                                                                                                                              |                                                                                 |
| 10% TSA        | solid  | 3 g/L tryptic soy medium (Sigma-Aldrich)<br>15 g/L agar (Sigma-Aldrich)                                                                                                                                                                               | 2 mL/L DMSO (Sigma-Aldrich)<br>10 mg/L Cycloheximide (Sigma-Aldrich)            |
| 10% TSA        | solid  | 3 g/L tryptic soy medium (Sigma-Aldrich)                                                                                                                                                                                                              | 200 mg/L MBOA (Sigma-Aldrich)                                                   |
| MBOA           |        | 15 g/L agar (Sigma-Aldrich)                                                                                                                                                                                                                           | 10 mg/L Cycloheximide (Sigma-Aldrich)                                           |

450

\*All media were sterilized by autoclaving.

451

\*\*Supplements (Cycloheximide, MBOA, Ampicillin, Chloramphenicol) were filter sterilized.

452

453 **Table S5: Stock solutions of compounds used for in vitro growth assays**

| Compound   | mol. weight | stock conc. [mM] | stock mg/mL | solvent |
|------------|-------------|------------------|-------------|---------|
| DIMBOA-Glc | 373.1       | 500              | 186.55      | DMSO    |
| MBOA       | 165         | 606              | 100         | DMSO    |
| BOA        | 135.1       | 500              | 67.55       | DMSO    |
| AMPO       | 242.23      | 15               | 3.6         | DMSO    |
| APO        | 212.21      | 15               | 3.18        | DMSO    |
| Ctrl       | 0           | 0                | 0           | DMSO    |

454

## 455 **Supplementary Datasets**

### 456 **Dataset S1: MRB strain collection sequences**

457 This table contains detailed information about the taxonomic assignment of the MRB isolates.  
458 Further information on the isolation experiment, the plant, the extract, and the isolation media are  
459 included. The partial sequence of the 16S rRNA gene obtained by Sanger sequencing along with  
460 the primer used is listed. For each strain it is indicated if and with which method the genome was  
461 sequenced. Additionally basic information of the genomes is listed.

### 462 **Dataset S2: MRB strain collection mapping**

463 The mapping of MRB isolates to the microbiome profiles of the maize roots, where they were  
464 isolated from (pot experiment with Changins soil) indicating the identity to the taxonomic units.

## 465 **References Supplementary Information**

466

- 467 1. D. Maag, *et al.*, Highly localized and persistent induction of Bx1-dependent herbivore  
468 resistance factors in maize. *Plant Journal* **88**, 976–991 (2016).
- 469 2. L. Hu, *et al.*, Root exudate metabolites drive plant-soil feedbacks on growth and defense by  
470 shaping the rhizosphere microbiota. *Nature Communications* **9**, 2738–2738 (2018).
- 471 3. S. Cadot, *et al.*, Specific and conserved patterns of microbiota-structuring by maize  
472 benzoxazinoids in the field. *Microbiome* **9**, 103–103 (2021).
- 473 4. J. M. Ruijter, *et al.*, Amplification efficiency: linking baseline and bias in the analysis of  
474 quantitative PCR data. *Nucleic Acids Research* **37**, 0–0 (2009).
- 475 5. N. Bodenhausen, *et al.*, Relative qPCR to quantify colonization of plant roots by arbuscular  
476 mycorrhizal fungi. *Mycorrhiza* **31**, 137–148 (2021).
- 477 6. T. E. A. Cotton, *et al.*, Metabolic regulation of the maize rhizobiome by benzoxazinoids. *The*  
478 *ISME Journal* **13**, 1647–1658 (2019).
- 479 7. S. Andrews, FastQC: A quality control tool for high throughput sequence data (2010).
- 480 8. M. Martin, Cutadapt removes adapter sequences from high-throughput sequencing reads.  
481 *EMBnet.journal* **17**, 10–12 (2011).
- 482 9. B. J. Callahan, *et al.*, DADA2: High-resolution sample inference from Illumina amplicon  
483 data. *Nature Methods* **13**, 581–583 (2016).
- 484 10. B. J. Callahan, Silva taxonomic training data formatted for DADA2 (Silva version 132)  
485 (2018) <https://doi.org/10.5281/zenodo.1172783>.
- 486 11. E. S. Wright, Using DECIPHER v2.0 to Analyze Big Biological Sequence Data in R. *R*  
487 *Journal* **8**, 352–359 (2016).
- 488 12. K. Yamada, *et al.*, Isolation and Identification of Phototropism-regulating Sub-  
489 stances Benzoxazinoids from Maize Coleoptiles. *Heterocycles* **63**, 2707–2712 (2004).
- 490 13. L. Thoenen, *et al.*, “Customisable high-throughput chemical phenotyping of root bacteria” in  
491 (in press).
- 492 14. D. G. Pitcher, N. A. Saunders, R. J. Owen, Rapid extraction of bacterial genomic DNA with  
493 guanidium thiocyanate. *Letters in Applied Microbiology* **8**, 151–156 (1989).
- 494 15. H. Li, *et al.*, The Sequence Alignment/Map format and SAMtools. *Bioinformatics* **25**, 2078–  
495 2079 (2009).
- 496 16. M. Kolmogorov, J. Yuan, Y. Lin, P. A. Pevzner, Assembly of long, error-prone reads using  
497 repeat graphs. *Nature Biotechnology* **37**, 540–546 (2019).
- 498 17. H. Li, R. Durbin, Fast and accurate short read alignment with Burrows-Wheeler transform.  
499 *Bioinformatics* **25**, 1754–1760 (2009).

- 500 18. B. J. Walker, *et al.*, Pilon: An Integrated Tool for Comprehensive Microbial Variant Detection  
501 and Genome Assembly Improvement. *PLOS ONE* **9**, 1–14 (2014).
- 502 19. S. Chen, Y. Zhou, Y. Chen, J. Gu, fastp: an ultra-fast all-in-one FASTQ preprocessor.  
503 *Bioinformatics* **34**, i884–i890 (2018).
- 504 20. A. Bankevich, *et al.*, SPAdes: A New Genome Assembly Algorithm and Its Applications to  
505 Single-Cell Sequencing. *Journal of Computational Biology* **19**, 455–477 (2012).
- 506 21. A. Gurevich, V. Saveliev, N. Vyahhi, G. Tesler, QUAST: Quality assessment tool for  
507 genome assemblies. *Bioinformatics* **29**, 1072–1075 (2013).
- 508 22. M. Seppey, M. Manni, E. M. Zdobnov, BUSCO: Assessing Genome Assembly and  
509 Annotation Completeness. *Methods of Molecular Biology* **1962**, 227–245 (2019).
- 510 23. A. J. Low, A. G. Koziol, P. A. Manninger, B. Blais, C. D. Carrillo, ConFindr: rapid detection  
511 of intraspecies and cross-species contamination in bacterial whole-genome sequence data.  
512 *PeerJ* **7**, e6995 (2019).
- 513 24. T. Tatusova, *et al.*, NCBI prokaryotic genome annotation pipeline. *Nucleic acids research*  
514 **44**, 6614–6624 (2016).
- 515 25. J. Huerta-Cepas, *et al.*, eggNOG 5.0: a hierarchical, functionally and phylogenetically  
516 annotated orthology resource based on 5090 organisms and 2502 viruses. *Nucleic Acids*  
517 *Research* **47**, 309–314 (2019).
- 518 26. D. M. Emms, S. Kelly, OrthoFinder: Phylogenetic orthology inference for comparative  
519 genomics. *Genome Biology* **20**, 1–14 (2019).
- 520 27. T. Roder, S. Oberhänsli, N. Shani, R. Bruggmann, OpenGenomeBrowser: A versatile,  
521 dataset-independent and scalable web platform for genome data management and  
522 comparative genomics. *bioRxiv* (2022) <https://doi.org/10.1101/2022.07.19.500583>.
- 523 28. S. Turner, K. M. Pryer, V. Miao, J. D. Palmer, Investigating Deep Phylogenetic  
524 Relationships among Cyanobacteria and Plastids by Small Subunit rRNA Sequence  
525 Analysis. *Journal of Eukaryotic Microbiology* **46**, 327–338 (1999).
- 526 29. M. Erb, *et al.*, Signal signature of aboveground-induced resistance upon belowground  
527 herbivory in maize. *Plant Journal* **59**, 292–302 (2009).
- 528 30. K. Schlaeppli, N. Dombrowski, R. G. Oter, E. V. L. van Themaat, P. Schulze-Lefert,  
529 Quantitative divergence of the bacterial root microbiota in *Arabidopsis thaliana* relatives.  
530 *Proceedings of the National Academy of Sciences of the United States of America* **111**,  
531 585–592 (2014).
- 532 31. J. T. Coombs, C. M. M. Franco, Isolation and Identification of Actinobacteria from Surface-  
533 Sterilized Wheat Roots. *Applied and Environmental Microbiology* **69**, 5603–5608 (2003).

534
